# Supplementary material for: Los yacimientos de oro-cobre del cinturón del río Narcea, Asturias, España
Source: MDPI journal article supplement (doi:10.3390/microorganisms12010081), 1998-01-01
Supplement: s1 [file s1]

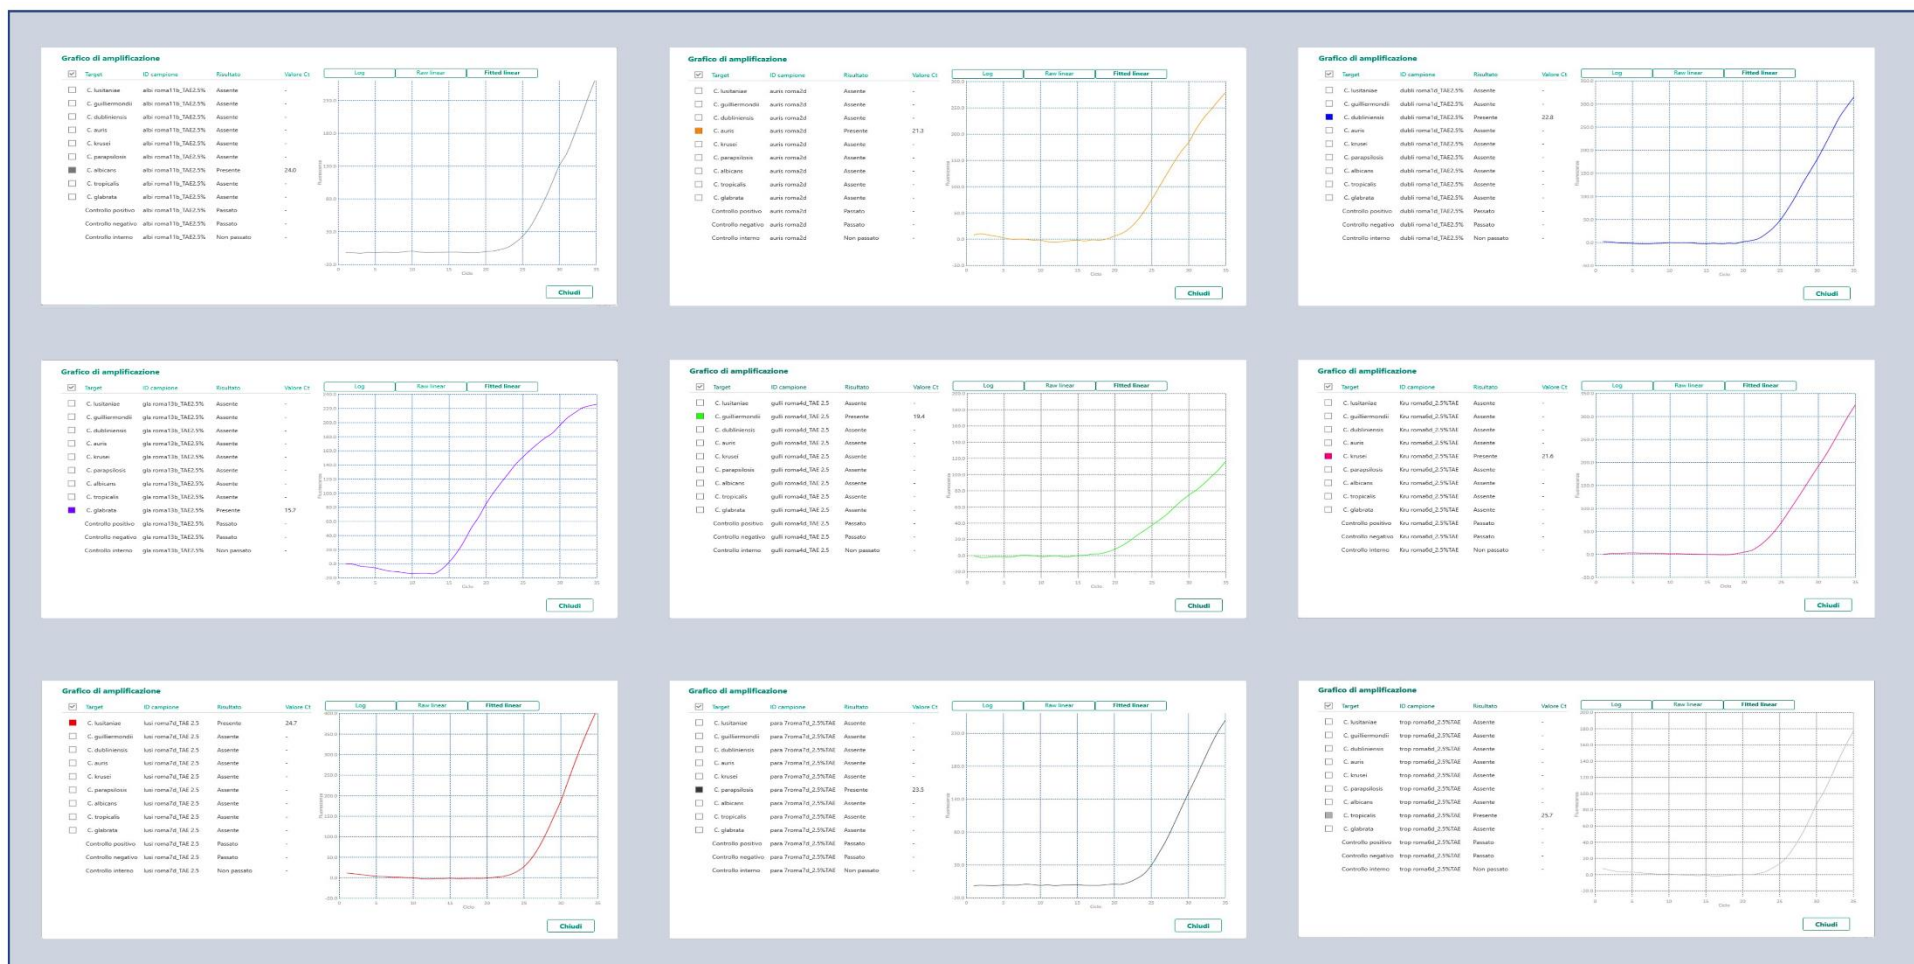

**Figure S1.** Real-time PCR results obtained with the MM YBL-chip assay, showing representative amplification curves for each *Candida* species targeted by the assay. A cycle threshold value (i.e., number of cycles at which the fluorescence signal crosses the threshold for positive detections) is shown from each fluorescence-versus-time sigmoidal curve.
